# Supplementary material for: Size-dependent strain and surface energies of gold nanoclusters
Source: Royal Society of Chemistry journal article supplement (doi:10.1039/c5cp06153a), 2015-11-18
Supplement: c5cp06153a1.pdf [file c5cp06153a1.pdf]

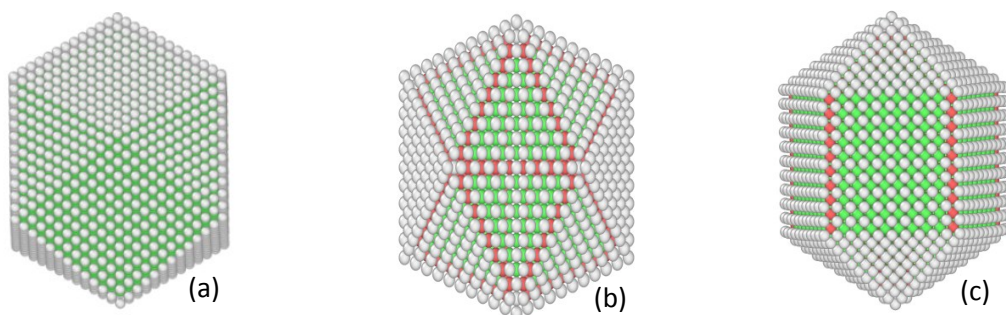

Figure: Cuboctahedron (a), Icosahedron (b) and Decahedron (c) Au cluster. FCC atoms are colored green, HCP red and other atoms are colored white
